# Supplementary material for: Emergency MRI in Spine Trauma of Children and Adolescents—A Pictorial Review
Source: MDPI journal article supplement (doi:10.3390/children10071094), 2023-06-21
Supplement: s1 [file s1]

**Table S1:** Sequence parameters in emergency MRI of the pediatric spine

|                      | Cervical spine |             |               |              |           | Thoracolumbar spine |             |               |              |           | Craniocervical junction |            |           |
|----------------------|----------------|-------------|---------------|--------------|-----------|---------------------|-------------|---------------|--------------|-----------|-------------------------|------------|-----------|
| Parameter            | Sagittal T1    | Sagittal T2 | Sagittal STIR | Coronal STIR | Axial T2  | Sagittal T1         | Sagittal T2 | Sagittal STIR | Coronal STIR | Axial T2  | Sagittal PD             | Coronal PD | Axial T2  |
| TR (ms)              | 550            | 3584        | 3305          | 3721         | 5717      | 683                 | 4955        | 4391          | 5778         | 3601      | 2500                    | 2500       | 5902      |
| TE (ms)              | 7              | 100         | 60            | 60           | 95        | 8                   | 100         | 60            | 60           | 100       | 20                      | 20         | 80        |
| Flip angle           | 80             | 90          | 90            | 90           | 90        | 80                  | 90          | 90            | 90           | 90        | 90                      | 90         | 90        |
| Slice thickness (mm) | 3              | 3           | 3             | 3            | 3         | 3                   | 3           | 3             | 4            | 3         | 2.5                     | 2.5        | 2.5       |
| Slice spacing        | 3.3            | 3.3         | 3.6           | 3.6          | 3.3       | 3.3                 | 3.3         | 3.3           | 4.4          | 3.3       | 2.75                    | 2.75       | 2.75      |
| Number of slices     | 15             | 15          | 15            | 18           | 35        | 21                  | 21          | 19            | 20           | 51        | 22                      | 16         | 27        |
| Matrix size          | 480 x 480      | 448 x 448   | 480 x 480     | 432 x 432    | 320 x 320 | 384 x 384           | 432 x 432   | 512 x 512     | 432 x 432    | 320 x 320 | 400 x 400               | 320 x 320  | 320 x 320 |
